# Supplementary material
Source: PubMed Central journal article supplement (PMC3606003)

**Supplementary Fig 1.** Main scan QTL LOD plot images. Representative LOD profile plots for two of the crosses examine in this study are shown. Specifically the B6x129S1 (upper panel) and the B6xC3H (lower panel) are presented.

**Supplementary Fig 2.** Narrowing of the Chrs 4, 6, and 19 QTL. Parts of the chromosomal backbone for Chr 4, 6, and 19 are shown. The minimum CI for each QTL is shown in white, whereas region in grey are considered out of the CI for the QTL. The location of haplotypes meeting the allele distribution patterns for each QTL are shown as black rectangles. The relative locations of the candidate genes are indicated.

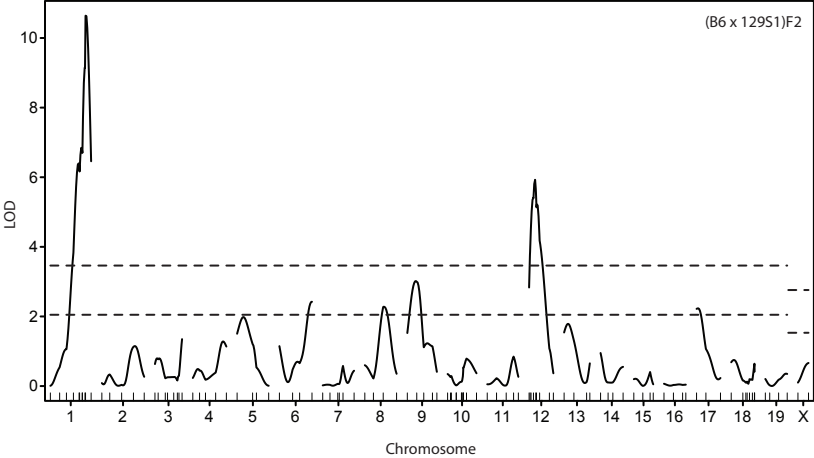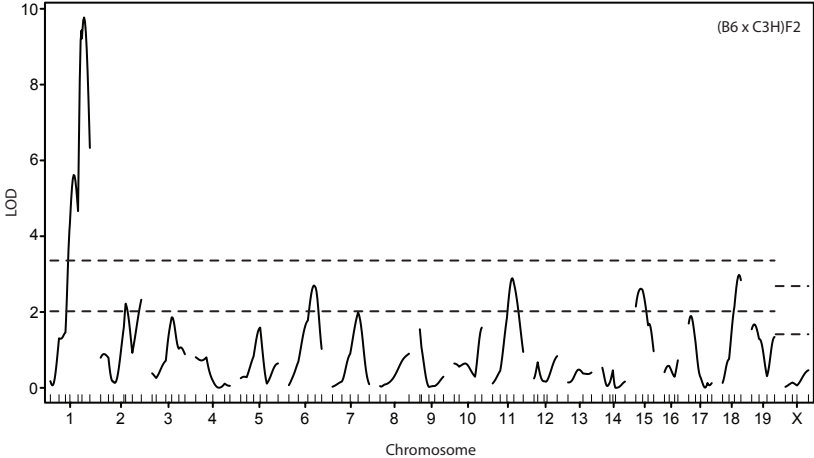

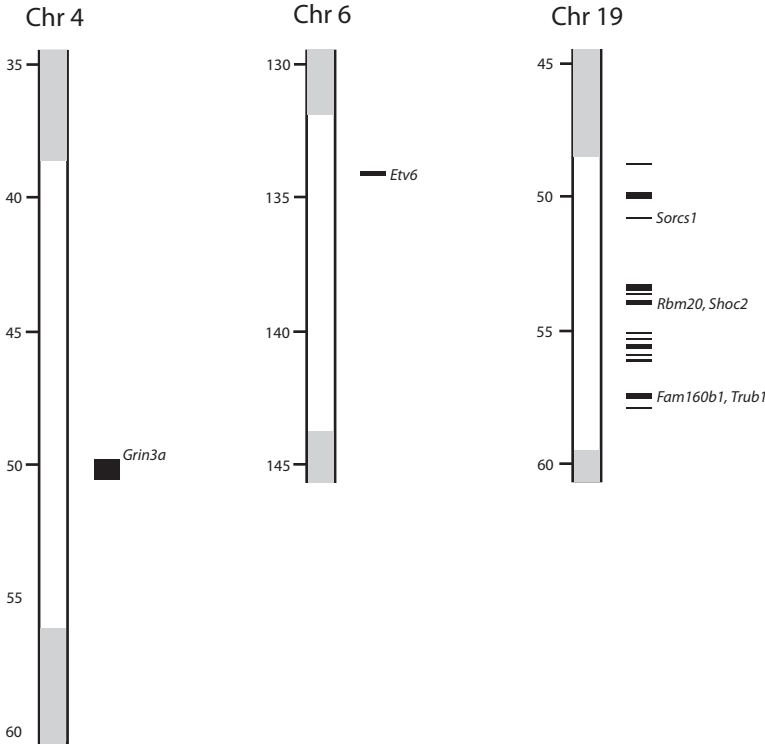

Supplement: supp_M033035_jlr.M033035-2.pdf [file supp_M033035_jlr.M033035-2.pdf]
